# Supplementary material
Source: publisher figshare collection journal article supplement (https://gsajournals.figshare.com/ndownloader/files/11429420)
Supplement: Supplementary file 1 [file 11429420]

## Sheet: Normalised Raw Data
File S3: Metabolite analysis of the wild-type and the protein kinase deletion strains after 48 h growth in cellulose-rich medium (HCA= hierarchical cluster analysis). Metabolites were compared between the protein kinase deletion strains and the WT (wild-type strain) and P-values < 0.05 are highlighted (blue = ΔpkpA, red = ΔpkpB and green = ΔpkpC) in the "Comparison with WT" tab.
Metabolite	Strain and replicate number
	ΔpkpA 1	ΔpkpA 2	ΔpkpA 3	ΔpkpA 4	ΔpkpB 1	ΔpkpB 2	ΔpkpB 3	ΔpkpB 4	ΔpkpC 1	ΔpkpC 2	ΔpkpC 3	ΔpkpC 4	WT 1	WT 2	WT 3	WT 4
Lactate	NA	NA	15.4682	13.9778	16.6235	17.0597	13.984	14.367	16.9074	16.6614	16.7869	17.4129	NA	16.5837	NA	16.1581
Similar to 2-Hydroxypyridine	12.8477	13.2875	12.7696	12.7943	12.5076	13.6641	13.2499	12.9418	12.4767	12.8525	12.6822	13.5781	12.9745	12.5166	NA	12.7588
Similar to Glycolate	NA	10.6985	10.7148	10.6826	10.3506	11.5568	NA	11.2724	11.0372	10.2419	11.1837	11.4589	11.3154	NA	11.999	NA
Alanine	13.6537	12.8349	12.0908	12.4629	12.9406	13.4042	11.4978	12.4965	12.5736	13.1771	12.5486	12.9329	14.0472	12.9042	11.7418	12.7065
Pyruvate	11.307	11.4541	10.063	9.68007	11.0777	11.6013	9.76258	10.0325	10.487	11.4505	10.3421	NA	12.1699	9.81443	11.1506	10.009
Valine	16.4721	16.9264	16.2864	16.4984	16.8298	16.8339	16.5591	16.6217	16.4697	16.2829	15.787	16.7135	17.9201	16.6664	17.8046	16.3439
Glycerol	10.3947	9.98376	10.8067	11.3103	10.7926	11.5029	11.2837	11.5334	10.4184	10.9536	11.0884	10.2479	9.56945	11.2534	10.1319	11.4327
Leucine	16.3209	16.5077	16.2735	16.3025	16.7414	16.8969	16.5246	16.7598	15.9719	15.9265	15.6508	16.3281	16.8267	15.8113	16.8735	15.8504
Isoleucine	15.4617	15.7435	15.414	15.5143	15.525	15.6777	15.6073	15.575	15.1468	15.1621	14.8589	15.5463	16.1659	15.1974	16.3036	15.3587
Glycine	10.2799	10.179	10.2806	10.8437	10.2266	10.6377	9.76236	10.6174	10.2248	10.3014	10.5602	10.0024	11.154	11.3574	10.5357	10.9683
Orthophosphate	13.0339	12.6148	13.7552	14.1344	12.6717	13.525	13.6394	14.1032	12.2295	12.5221	12.8203	12.0962	13.303	14.361	13.6674	14.2867
Proline	17.2172	17.2537	17.0964	17.018	17.6721	16.4872	17.1391	17.1597	17.9345	16.9198	16.8343	17.1855	17.3718	17.3349	17.2014	16.9617
Glycerate	9.21501	9.37567	10.0965	NA	9.96042	10.3797	9.65977	10.3194	8.42976	8.90382	9.47326	8.4099	9.32507	9.80936	10.0883	9.9275
Serine	10.3204	10.0326	10.4725	10.8058	10.2969	10.4954	10.1861	10.7463	9.51329	9.58956	9.91567	9.30095	11.4448	11.7449	11.0672	10.8993
Similar to Riboflavin	13.6199	13.1954	13.7794	13.5313	12.2354	12.3873	12.9835	12.5543	12.3481	13.0925	12.7319	13.1412	12.4781	13.1605	13.2147	14.319
Succinate	11.4879	11.0953	9.23853	8.69486	12.2661	12.3004	9.74646	9.86811	13.2024	14.1277	12.5087	NA	NA	8.42457	9.33134	9.07919
Threonine	8.37186	8.40674	8.86292	9.31409	8.92168	8.74259	8.62137	9.29553	8.31692	8.40027	8.48612	8.16466	10.4939	10.6577	10.2036	10.3616
C4H4O4 [Fumarate|Maleate]	14.0374	13.3231	13.1434	12.3794	14.1083	14.0477	13.2421	12.8137	14.6112	14.9062	14.0875	15.0763	13.3285	11.6709	12.5996	12.4793
Nicotinate	12.768	13.1571	13.193	13.385	13.186	13.543	13.7652	13.3952	13.4155	13.0691	12.6575	13.4748	12.2175	12.2698	NA	12.4165
Uracil	10.902	10.9664	11.7456	12.2995	12.0972	12.6662	12.0262	12.9241	10.0636	10.7342	11.0918	10.2553	12.8278	12.9346	12.9445	12.7331
Similar to Tartronate	9.65766	8.37739	NA	9.63208	10.0794	8.76547	8.57117	10.1067	NA	8.09523	8.21651	NA	11.4865	10.8609	12.2974	10.9559
Thymine	6.44352	6.23624	NA	NA	7.16379	7.26793	NA	NA	5.69188	6.5561	6.30171	6.27416	7.01752	8.60874	8.47034	9.31116
Similar to Citramalate	NA	6.92212	7.3112	6.63885	7.67365	7.718	6.84132	7.15231	6.56082	NA	NA	6.90561	NA	6.15541	6.29318	6.13607
Malate	14.5696	13.7919	14.3977	13.2952	14.6926	14.8256	14.5919	14.2068	15.3749	15.5364	14.5919	15.5022	13.3213	12.7893	13.289	13.3057
4-Aminobutanoate	13.5181	13.5281	13.0096	12.5418	12.7073	11.9087	11.3181	12.0636	13.5395	13.6032	12.9612	NA	12.5755	11.1927	12.975	11.0948
Aspartate	16.9289	17.3467	16.6505	16.7818	16.7629	17.0563	17.2435	17.2675	16.1427	15.5515	16.1989	15.5102	15.7215	16.7519	16.202	16.3619
Iminodiacetate	7.82537	8.78522	NA	NA	9.73154	8.61718	NA	NA	10.0267	10.6205	9.1944	10.2506	8.97217	12.982	12.5538	NA
Asparagine	8.77397	9.33623	9.82321	10.5271	9.01173	10.4614	10.4881	10.8581	10.4126	9.98832	9.86826	11.1625	10.0362	10.2148	NA	10.2746
Methionine	12.8568	12.6159	13.0131	13.0354	13.2936	13.1205	13.2213	13.3265	13.1427	13.1207	12.8971	13.0681	12.8598	12.7961	13.2967	12.7215
Cysteine	9.57049	9.70589	NA	NA	10.0218	9.62132	NA	11.101	10.2078	10.2084	9.71741	9.6596	9.21469	11.2198	11.2996	11.3607
Lyxose	NA	7.46889	NA	7.85218	7.34729	7.60724	8.45532	8.12903	7.50001	7.26049	NA	7.69745	6.57489	7.60163	NA	7.48453
Arginine	12.3834	12.4646	12.59	12.1773	11.0264	10.9684	11.9568	11.6406	13.6518	12.7622	12.8039	13.7868	11.7267	12.2641	11.9452	11.2072
Ornithine	7.95466	8.07152	7.90021	7.90751	6.80055	6.92132	7.34502	7.09408	9.48326	8.52127	8.6387	9.5128	7.62395	7.61691	7.438	6.34676
C5H10O5 [Xylose|Arabinose|Lyxose]	11.1674	10.5628	11.8837	11.6418	NA	10.3475	11.7012	11.5508	10.0633	10.4719	10.5098	10.8057	NA	NA	11.1505	10.3758
Similar to Xylitol	13.7381	15.0244	12.385	12.6364	NA	14.8192	13.2072	13.3237	12.4253	12.8832	13.3078	13.3661	12.2443	NA	NA	10.4507
(r|x) C5H10O5 [Ribose|Ribulose]	14.7353	15.9783	14.3071	14.2594	NA	15.7096	14.583	14.3914	13.3535	13.6691	14.205	14.3499	13.1167	14.3426	14.3499	13.493
(r|x) C5H12O5 [Ribitol|Arabitol]	NA	NA	10.6996	9.52659	NA	NA	12.5941	11.5871	12.6621	12.7783	NA	12.8676	12.0912	10.2518	12.1676	9.601
5-Oxoproline	11.7415	11.6305	11.3862	11.8991	11.4519	12.0618	11.6489	11.9438	11.2211	11.5766	11.894	11.094	11.6654	11.6608	12.291	11.626
Glutamate	11.804	11.7877	11.7671	12.3167	11.4665	11.7022	11.5454	12.3078	11.2425	11.769	11.9678	10.8484	11.7742	11.6964	11.39	11.4554
Similar to Nicotinamide	10.7873	8.73541	11.2726	9.7486	9.16491	6.98423	8.7717	9.1685	6.83138	10.461	NA	9.20962	NA	9.88301	10.0109	9.4453
Ketoglutarate	11.5238	10.7697	11.0648	10.5058	11.3657	11.5391	11.29	11.0327	10.413	11.7386	10.9358	11.9524	10.4927	9.64605	10.4724	10.2219
Phenylalanine	14.6823	14.8166	14.8774	14.581	14.8638	14.7678	15.2327	14.9197	14.2445	14.444	14.098	14.401	14.0342	14.5234	14.7433	14.3891
4-Hydroxybenzoate	6.76432	6.71169	7.52426	7.13075	7.45583	7.28756	8.05472	7.76131	7.35535	7.28117	7.40616	7.53666	6.13618	6.91868	6.69135	NA
Agmatine	12.0254	11.742	NA	13.1797	12.1317	12.189	NA	NA	11.7248	11.8542	11.8933	11.8235	11.5014	12.7454	13.3025	12.9518
Similar to Glycerol-3-P	16.1563	15.7498	17.8718	17.7944	15.7462	15.8445	17.1477	NA	15.7773	16.0582	15.9447	15.7442	NA	17.0767	NA	17.4387
Fructose [|Psicose]	16.1672	15.9473	17.1164	17.3467	15.7325	16.0087	16.4611	16.9288	15.9666	16.5471	16.8942	16.0323	16.1465	16.5388	16.3046	17.1604
Citrate	8.95562	8.44732	9.98634	NA	9.41691	9.69744	10.28	NA	7.90187	8.66442	NA	7.97857	9.63314	9.8102	10.2268	9.44009
Glutamine	8.60517	8.35009	NA	NA	9.13451	8.14993	8.89065	NA	9.80898	9.26482	9.20228	9.457	10.6069	10.286	11.0101	8.96328
Glucose	16.1672	15.9473	17.1164	17.3467	15.7325	16.0087	16.4611	16.9288	15.9666	16.5471	16.8942	16.0323	16.1465	16.5388	16.3046	17.1604
Lysine	13.7453	14.3081	14.4909	14.959	13.6425	13.8833	13.9637	NA	14.5413	14.6478	15.2167	14.2619	NA	14.7282	14.8988	NA
Glucuronate	6.61082	NA	6.86567	7.98929	NA	NA	NA	NA	10.1017	10.6569	11.3337	9.81365	NA	8.14592	NA	NA
Galacturonate|Gluconate	6.18233	7.242	6.73257	7.35513	6.54361	7.21241	6.29822	6.57715	7.35639	8.19531	NA	7.8141	NA	6.49645	NA	7.15601
Similar to Pyridoxine	5.13996	5.64937	4.96121	5.69551	6.38289	6.21216	5.74816	5.77439	5.31138	NA	5.94641	5.41384	NA	5.49125	NA	5.26607
myo-Inositol	9.96113	9.40284	NA	NA	9.17314	9.68108	NA	NA	9.10182	9.49695	9.98278	9.17417	9.0145	10.3957	11.0882	10.8136
Tyrosine	12.6744	13.6923	13.9301	14.3461	13.4101	13.3412	13.0846	13.5222	13.5797	14.5209	14.9001	13.7408	NA	13.665	NA	13.6533
Histidine	10.8926	12.0677	13.2787	13.6834	10.3585	10.5634	11.8443	11.6313	13.0889	13.9829	14.5015	13.3527	13.5866	12.8341	NA	12.5543
Adenine	8.60998	NA	10.2011	10.9068	10.2206	11.2063	8.78138	8.26947	9.68664	8.72105	NA	10.1738	11.1716	11.9799	11.091	11.3441
Spermidine	5.66519	6.15298	6.35019	6.83556	6.65209	6.23884	6.24722	5.8897	6.23097	NA	NA	6.27733	NA	5.99395	7.52582	7.27262
C6H13O9P [Glc 6-P|Gal 6-P]	7.69884	7.20363	5.36434	4.70227	NA	6.00156	4.52984	5.90464	5.88801	NA	NA	7.23636	NA	4.65168	NA	4.31848
Tryptophan	6.4649	7.1017	8.3927	8.57048	7.6811	7.24678	8.15361	8.23465	7.35799	7.40391	NA	7.4743	9.54162	8.53017	NA	8.88424
Sucrose	9.05259	9.39888	9.30617	10.2009	9.99096	9.62826	9.57779	10.0971	9.20856	NA	NA	9.15568	10.0329	9.25888	NA	9.19741
Trehalose	11.524	11.8376	NA	NA	13.2604	12.966	NA	NA	13.3631	14.1827	13.9723	13.2403	14.5176	15.1625	NA	15.437
AMP (A[M|D|T]P)	NA	8.68625	8.64383	7.88454	7.96878	NA	7.20151	6.77214	6.75417	8.72254	NA	8.36841	NA	9.21527	10.2671	10.1392

## Sheet: Loadings
%	0.4	0.21	0.11	0.07	0.07
	PC1	PC2	PC3	PC4	PC5			negative	Metabolites responsible for the separation of PC1 (axis x). In this case, it separates pKp mutants x WT
Lactate	0.0810515	-0.412581	0.126997	0.0619377	-0.199565			positive
Similar to 2-Hydroxypyridine	0.0294113	0.0230226	0.0290776	-0.0317264	-0.0091708
Similar to Glycolate	-0.0617198	-0.0671719	0.0113679	-0.0796775	-0.138175			negative	Metabolites responsible for the separation of PC2 (axis y). In this case, it separates mainly pKpC and WT from the others
Alanine	0.0696071	-0.0792372	0.112485	0.00177289	0.116609			positive
Pyruvate	0.107545	-0.1004	0.167518	0.125292	0.016028
Valine	-0.0152453	-0.0692253	0.139631	0.0926914	-0.0444226
Glycerol	-0.0502362	0.0853532	-0.0451192	-0.18069	-0.0690197
Leucine	0.00391053	0.0206944	0.128498	0.0377158	-0.0511253
Isoleucine	-0.0153231	-0.0186264	0.0957989	0.0646955	-0.0158404
Glycine	-0.0489343	-0.0720529	0.0408875	-0.0737025	0.0582335
Orthophosphate	-0.149818	0.0291479	0.056972	-0.0955506	0.0414233
Proline	0.00820685	-0.00863939	-0.00293576	0.0679599	-0.0319331
Glycerate	-0.0849032	0.0504197	0.127326	-0.0955982	-0.0113874
Serine	-0.115912	-0.0529153	0.137129	-0.0256456	0.055553
Similar to Riboflavin	-0.0666508	0.0168312	-0.0735502	0.077783	0.155803
Succinate	0.383798	-0.133865	-0.0843134	0.0739551	-0.229438
Threonine	-0.148085	-0.133031	0.11579	-0.0122062	0.00439277
C4H4O4 [Fumarate|Maleate]	0.197229	-0.00857963	-0.0748811	0.0780036	-0.102743
Nicotinate	0.0411458	0.103319	-0.0369623	-0.0468845	-0.079974
Uracil	-0.169546	-0.0313301	0.234183	-0.117501	-0.0614721
Similar to Tartronate	-0.217825	-0.136846	0.273785	0.200421	0.0838451
Thymine	-0.208239	-0.00492581	0.0753733	-0.0245395	-0.0973681
Similar to Citramalate	0.0529205	0.0982037	0.100577	0.0271663	0.0016098
Malate	0.150527	0.0670257	-0.114972	0.0482099	-0.153034
4-Aminobutanoate	0.139692	-0.0259715	-0.0926672	0.219629	0.116858
Aspartate	-0.0324837	0.143353	0.0949642	-0.0834692	0.0234652
Iminodiacetate	-0.264167	-0.0383229	-0.219337	0.112587	-0.350093
Asparagine	-0.03138	-0.0226705	-0.101118	-0.103603	-0.143564
Methionine	0.00140459	0.0183301	0.00222195	0.0148061	-0.0773774
Cysteine	-0.145493	0.065929	-0.0898695	0.0210406	-0.139365
Lyxose	-0.0244263	0.108787	-0.0504689	-0.0174435	-0.0388703
Arginine	0.0727899	-0.0249139	-0.26273	0.112325	0.0595485
Ornithine	0.112818	-0.046505	-0.247355	0.0804283	0.0509739
C5H10O5 [Xylose|Arabinose|Lyxose]	-0.0735925	0.131687	-0.0504541	0.0618463	0.0521113
Similar to Xylitol	0.225663	0.202794	0.154639	-0.156705	0.102761
(r|x) C5H10O5 [Ribose|Ribulose]	0.0335394	0.13572	0.133828	-0.0521213	0.0163729
(r|x) C5H12O5 [Ribitol|Arabitol]	0.18262	0.0422334	0.147857	0.301592	-0.351906
5-Oxoproline	-0.0265595	0.00363499	0.0514664	-0.0389523	0.00791394
Glutamate	-0.0193444	0.0302331	0.0168353	-0.0712722	0.100053
Similar to Nicotinamide	-0.113085	0.0104916	-0.0253156	0.42521	0.328435
Ketoglutarate	0.0898776	0.071057	0.0034985	0.0761685	-0.0393118
Phenylalanine	-0.0176706	0.0819549	0.0352208	0.0291353	-0.0385486
4-Hydroxybenzoate	0.00530204	0.0907493	-0.0817	-0.0543012	-0.117475
Agmatine	-0.118082	0.0652806	-0.0184113	-0.00208343	-0.0672317
Similar to Glycerol-3-P	-0.155496	0.0943432	-0.0982834	-0.0164348	0.0583871
Fructose [|Psicose]	-0.0704569	0.01421	-0.0946117	-0.0740505	0.0969707
Citrate	-0.130507	0.0456949	0.149035	0.0204317	-0.0676252
Glutamine	-0.0624593	-0.163885	-0.0293026	0.157415	-0.0622488
Glucose	-0.0704569	0.01421	-0.0946117	-0.0740505	0.0969707
Lysine	-0.040107	-0.106381	-0.0931916	-0.056223	0.0662846
Glucuronate	0.203799	-0.507336	0.0260604	-0.271849	0.0457632
Galacturonate|Gluconate	0.0756664	-0.0932012	-0.133164	-0.134982	0.0484154
Similar to Pyridoxine	0.0206534	0.0104286	0.0829233	-0.120897	-0.0598987
myo-Inositol	-0.124344	0.0428066	-0.0349245	0.010174	-0.00906925
Tyrosine	0.01445	-0.0694964	-0.122577	-0.129825	0.0935621
Histidine	-0.00953518	-0.206311	-0.375569	-0.0771133	0.20477
Adenine	-0.101878	-0.219599	0.0808435	-0.207257	0.00716643
Spermidine	-0.046133	-0.102104	0.036343	0.00807674	-0.034408
C6H13O9P [Glc 6-P|Gal 6-P]	0.184783	0.0201933	0.104904	0.22909	0.118417
Tryptophan	-0.138028	-0.131482	0.0280116	-0.0138716	-0.0417744
Sucrose	-0.0118164	0.00597017	0.0655944	-0.0829696	0.00325588
Trehalose	-0.170024	-0.205928	-0.0891298	-0.0389151	-0.176268
AMP (A[M|D|T]P)	-0.10579	-0.269043	0.116616	0.288408	0.210494

## Sheet: Comparison with WT
	Log2								Relative
	ΔpkpA		ΔpkpB		ΔpkpC		WT		ΔpkpA		ΔpkpB		ΔpkpC		WT
Metabolite	Fch	p.value	Fch	p.value	Fch	p.value	Fch		Fch	p.value	Fch	p.value	Fch	p.value	Fch
Lactate	-1.64791	0.251415	-0.862389	0.355143	0.57123	0.151728	0		0.358715	0.251415	0.802181	0.355143	1.50033	0.151728	1
Similar to 2-Hydroxypyridine	0.174826	0.379274	0.340891	0.280826	0.147394	0.615775	0		1.13213	0.379274	1.31055	0.280826	1.148	0.615775	1
Similar to Glycolate	-0.958508	0.217852	-0.597211	0.323931	-0.676751	0.242475	0		0.500497	0.217852	0.681778	0.323931	0.636412	0.242475	1
Alanine	-0.0893891	0.882947	-0.265145	0.686023	-0.0418799	0.937257	0		0.870257	0.882947	0.788779	0.686023	0.840517	0.937257	1
Pyruvate	-0.159954	0.828257	-0.167491	0.818791	-0.0261445	0.969484	0		0.820376	0.828257	0.815259	0.818791	0.836981	0.969484	1
Valine	-0.637931	0.209663	-0.472624	0.32223	-0.870495	0.115194	0		0.584151	0.209663	0.648499	0.32223	0.503635	0.115194	1
Glycerol	0.0269882	0.961316	0.681276	0.230444	0.0802355	0.877883	0		0.94384	0.961316	1.42973	0.230444	0.951726	0.877883	1
Leucine	0.0106415	0.973739	0.39016	0.280164	-0.371179	0.314215	0		0.949517	0.973739	1.23787	0.280164	0.737536	0.314215	1
Isoleucine	-0.222988	0.490227	-0.160149	0.608113	-0.577834	0.131666	0		0.813918	0.490227	0.847441	0.608113	0.643229	0.131666	1
Glycine	-0.608016	0.039928	-0.692798	0.0437095	-0.731665	0.0164324	0		0.653634	0.039928	0.623444	0.0437095	0.59522	0.0164324	1
Orthophosphate	-0.519999	0.272714	-0.419735	0.326174	-1.48752	0.0041018	0		0.724422	0.272714	0.75876	0.326174	0.34757	0.0041018	1
Proline	-0.0711451	0.538438	-0.102954	0.712905	0.00106984	0.997001	0		0.948162	0.538438	0.964429	0.712905	1.04424	0.997001	1
Glycerate	-0.225169	0.522761	0.292274	0.259914	-0.983362	0.0208109	0		0.871366	0.522761	1.22609	0.259914	0.520602	0.0208109	1
Serine	-0.881236	0.012793	-0.857885	0.0121206	-1.7092	0.00054924	0		0.538851	0.012793	0.543459	0.0121206	0.30148	0.00054924	1
Similar to Riboflavin	0.238377	0.586691	-0.752994	0.142025	-0.464694	0.329312	0		1.06833	0.586691	0.542159	0.142025	0.664733	0.329312	1
Succinate	1.18412	0.185541	2.10025	0.0545105	4.33454	0.00321679	0		2.98222	0.185541	5.77142	0.0545105	21.6877	0.00321679	1
Threonine	-1.6903	0.00202493	-1.5339	0.000273238	-2.08721	5.49266e-06	0		0.319282	0.00202493	0.348589	0.000273238	0.234544	5.49266e-06	1
C4H4O4 [Fumarate|Maleate]	0.701241	0.194977	1.03334	0.0675924	2.15072	0.00291388	0		1.62733	0.194977	2.0218	0.0675924	4.229	0.00291388	1
Nicotinate	0.824493	0.00400735	1.17107	0.000764462	0.852925	0.0158314	0		1.78858	0.00400735	2.27216	0.000764462	1.84758	0.0158314	1
Uracil	-1.38163	0.0243104	-0.431573	0.141305	-2.32378	0.00156725	0		0.415877	0.0243104	0.766172	0.141305	0.207392	0.00156725	1
Similar to Tartronate	-2.1778	0.014208	-2.01949	0.00958455	-3.2443	0.00178376	0		0.219445	0.014208	0.255344	0.00958455	0.0971847	0.00178376	1
Thymine	-2.01206	0.0225176	-1.13608	0.0986684	-2.14598	0.0152414	0		0.215147	0.0225176	0.39409	0.0986684	0.200067	0.0152414	1
Similar to Citramalate	0.7625	0.0519931	1.15143	0.0101061	0.53833	0.175088	0		1.72585	0.0519931	2.28936	0.0101061	1.46093	0.175088	1
Malate	0.837298	0.0566767	1.40291	0.000278126	2.07501	0.000565784	0		1.87286	0.0566767	2.64684	0.000278126	4.30247	0.000565784	1
4-Aminobutanoate	1.18987	0.0837284	0.0399075	0.945724	1.40846	0.053744	0		2.02078	0.0837284	0.929537	0.945724	2.30701	0.053744	1
Aspartate	0.667605	0.0474508	0.823207	0.0218786	-0.4085	0.199241	0		1.56474	0.0474508	1.72973	0.0218786	0.747739	0.199241	1
Iminodiacetate	-3.19734	0.117009	-2.32828	0.204048	-1.47961	0.364595	0		0.0686057	0.117009	0.127641	0.204048	0.227052	0.364595	1
Methionine	-0.560079	0.229767	0.0296202	0.947237	0.182723	0.582655	0		0.747523	0.229767	1.12561	0.947237	1.20911	0.582655	1
Cysteine	-0.0381926	0.821363	0.321977	0.0830852	0.138636	0.379085	0		0.967989	0.821363	1.23621	0.0830852	1.08944	0.379085	1
Asparagine	-1.13551	0.116288	-0.525653	0.476181	-0.825395	0.212229	0		0.39251	0.116288	0.659925	0.476181	0.494045	0.212229	1
Lyxose	0.440183	0.329087	0.66437	0.178253	0.265634	0.508918	0		1.3066	0.329087	1.58237	0.178253	1.15634	0.508918	1
Arginine	0.618062	0.0622669	-0.387733	0.281341	1.46539	0.00637053	0		1.49106	0.0622669	0.770239	0.281341	2.8122	0.00637053	1
Ornithine	0.70207	0.104714	-0.216162	0.547267	1.7826	0.00481656	0		1.53633	0.104714	0.820366	0.547267	3.41211	0.00481656	1
C5H10O5 [Xylose|Arabinose|Lyxose]	0.550735	0.363768	0.43666	0.507624	-0.300512	0.576327	0		1.49734	0.363768	1.41272	0.507624	0.796522	0.576327	1
Similar to Xylitol	2.0985	0.193337	2.43593	0.165984	1.64814	0.304154	0		4.69571	0.193337	5.1851	0.165984	2.69986	0.304154	1
(r|x) C5H10O5 [Ribose|Ribulose]	0.994465	0.100364	1.06912	0.105698	0.0688175	0.865357	0		2.12209	0.100364	2.14002	0.105698	1.01919	0.865357	1
(r|x) C5H12O5 [Ribitol|Arabitol]	-0.914825	0.366362	1.06272	0.271072	1.74145	0.0744569	0		0.438064	0.366362	1.68976	0.271072	2.55242	0.0744569	1
5-Oxoproline	-0.146456	0.481046	-0.034207	0.877238	-0.364372	0.182986	0		0.893071	0.481046	0.970615	0.877238	0.779993	0.182986	1
Glutamate	0.33988	0.0861166	0.176463	0.448213	-0.122079	0.676328	0		1.27491	0.0861166	1.15493	0.448213	0.955248	0.676328	1
Similar to Nicotinamide	0.356253	0.582686	-1.25741	0.0906002	-0.94573	0.468965	0		1.55091	0.582686	0.480642	0.0906002	0.791393	0.468965	1
Ketoglutarate	0.757767	0.0423615	1.09864	0.00559454	1.05171	0.052865	0		1.70607	0.0423615	2.10289	0.00559454	2.20356	0.052865	1
Phenylalanine	0.316771	0.120962	0.523482	0.0311081	-0.125642	0.491897	0		1.23026	0.120962	1.42595	0.0311081	0.906478	0.491897	1
4-Hydroxybenzoate	0.450684	0.202139	1.05778	0.0217379	0.812765	0.066096	0		1.36871	0.202139	2.0735	0.0217379	1.717	0.066096	1
Agmatine	-0.309596	0.623805	-0.464922	0.321117	-0.801302	0.133013	0		0.809476	0.623805	0.658966	0.321117	0.522299	0.133013	1
Similar to Glycerol-3-P	-0.364643	0.566522	-1.01159	0.144536	-1.3766	0.0504051	0		0.942292	0.566522	0.546624	0.144536	0.383615	0.0504051	1
Fructose [|Psicose]	0.106799	0.804985	-0.254818	0.48785	-0.177517	0.591495	0		1.12742	0.804985	0.848607	0.48785	0.882183	0.591495	1
Citrate	-0.647791	0.286472	0.0205636	0.949692	-1.59593	0.00655513	0		0.691777	0.286472	1.02551	0.949692	0.333683	0.00655513	1
Glutamine	-1.73895	0.02561	-1.49155	0.0395452	-0.783313	0.175179	0		0.266582	0.02561	0.327942	0.0395452	0.522203	0.175179	1
Glucose	0.106799	0.804985	-0.254818	0.48785	-0.177517	0.591495	0		1.12742	0.804985	0.848607	0.48785	0.882183	0.591495	1
Lysine	-0.437665	0.182073	-0.983645	0.00551576	-0.146559	0.53976	0		0.770439	0.182073	0.507041	0.00551576	0.929444	0.53976	1
Glucuronate	-0.990667	NA	#VALUE!	NA	2.33057	NA	0		0.551297	NA	#VALUE!	NA	5.46715	NA	1
Galacturonate|Gluconate	0.0517769	0.912505	-0.168382	0.708528	0.962366	0.138759	0		1.06066	0.912505	0.892572	0.708528	1.95224	0.138759	1
Similar to Pyridoxine	-0.0171495	0.940328	0.650738	0.0304259	0.178547	0.49031	0		1.00899	0.940328	1.59399	0.0304259	1.15027	0.49031	1
myo-Inositol	-0.646017	0.296516	-0.900893	0.161906	-0.889073	0.149636	0		0.573064	0.296516	0.478733	0.161906	0.489886	0.149636	1
Tyrosine	0.00160551	0.99668	-0.319585	0.0408119	0.526266	0.192986	0		1.08628	0.99668	0.806163	0.0408119	1.54639	0.192986	1
Histidine	-0.511048	0.504876	-1.89229	0.0113254	0.739827	0.157352	0		0.857415	0.504876	0.283249	0.0113254	1.71433	0.157352	1
Adenine	-1.49073	0.150511	-1.77723	0.0723155	-1.86951	0.0306939	0		0.417919	0.150511	0.386852	0.0723155	0.287724	0.0306939	1
Spermidine	-0.67982	0.290377	-0.673836	0.288651	-0.676644	0.289527	0		0.59177	0.290377	0.579941	0.288651	0.568778	0.289527	1
C6H13O9P [Glc 6-P|Gal 6-P]	1.75719	0.0893568	0.993602	0.16339	2.07711	0.183135	0		4.68415	0.0893568	2.17464	0.16339	4.65768	0.183135	1
Tryptophan	-1.3529	0.0745752	-1.15631	0.0352217	-1.57328	0.0322806	0		0.445014	0.0745752	0.445556	0.0352217	0.322037	0.0322806	1
Sucrose	-0.0067484	0.986052	0.327136	0.354769	-0.314267	0.362759	0		1.00658	0.986052	1.22429	0.354769	0.775577	0.362759	1
Trehalose	-3.35823	0.00201633	-1.9258	0.00971677	-1.34945	0.0163718	0		0.0948148	0.00201633	0.255727	0.00971677	0.393916	0.0163718	1
AMP (A[M|D|T]P)	-1.46901	0.0275386	-2.55973	0.0060935	-1.92551	0.0660218	0		0.354799	0.0275386	0.171609	0.0060935	0.291373	0.0660218	1
